# Supplementary material
Source: PubMed Central journal article supplement (PMC4335193)

### **Figure 8.**

Administration of minocycline reduced the density of microglial inflammation and abolished disease induced changes at paranodal and nodal units. (A- C) The density of CD11b immunoreactivity (mean signal intensity per animal $\pm$  sem) in transverse spinal cord was greatly reduced in minocycline treated mice in comparison to vehicle dosed MOG immunised animals. (D, G) Minocycline treated animals contained microglia with a resting morphology that lacked TLR4 expression, in contrast to microglia in vehicle MOG immunised mice (E, H). (F) Nfasc155<sup>+</sup> paranode length was increased in vehicle treated animals in comparison to the minocycline group (Box plot of mean paranodal lengths per case showing minimum, maximum, interquartile and median values), whilst the incidence of nodal abnormalities was greater in the vehicle dosed animals (I). n=5 animals per group; \* $=p<0.05$ , \*\* $=p<0.01$  Mann-Whitney test. Dpi; days post induction. Scale bars A, B= 200 $\mu$ m, D- H= 30 $\mu$ m.

### **Supplementary Figure 1.**

Microglial inflammation, paranodal disruption and axonal pathology in Parkinson's disease subcortical white matter. (A, B) CD68<sup>+</sup> microglia were distributed throughout the MS NAWM and PD subcortical WM. (C) Nfasc155<sup>+</sup> paranode length was significantly increased in areas of subcortical white matter in tissue blocks from six cases of Parkinson's disease in comparison to controls (Mann-Whitney test, \*\*\* $=p<0.001$ ). (D- F) Immunostaining for the paranodal axo-glial protein Caspr1 and  $\beta$ IV spectrin, a component of mature nodes of Ranvier, revealed examples of disrupted and elongated paranodes (arrows). (G, H) Paranodal disruption associated with SMI32<sup>+</sup> stressed or damaged axons, whilst the aberrant expression of juxtaparanodal K<sub>v</sub>1.2 channels in Nfasc155<sup>+</sup> domains is suggestive of breakdown of normal paranodal barrier function (I- K, arrows). NAWM; normal appearing white matter. Scale bars, A, B= 100 $\mu$ m; C- J= 2 $\mu$ m.

**Supplementary Table 1. Primary antibodies**

| <i>Antigen</i>      | <i>Specificity</i>                                  | <i>Clone</i> | <i>Source</i>                            |
|---------------------|-----------------------------------------------------|--------------|------------------------------------------|
| MOG                 | Myelin and oligodendrocytes                         | Z12          | S. Piddlesden, University of Cardiff, UK |
| MBP                 | Myelin and oligodendrocytes                         | Polyclonal   | R. Reynolds, Imperial College, UK        |
| Neurofilament-H     | Primary dendrites and axons                         | Rt97         | Millipore                                |
| Smi32               | Dephosphorylated neurofilaments                     | Smi32        | Invitrogen Ltd, Paisley, UK              |
| APP                 | Amyloid precursor protein                           | 22C11        | Chemicon International                   |
| $\alpha$ -synuclein | $\alpha$ -synuclein 1                               | 42           | Beckton-Dickinson, Oxford, UK            |
| iNOS                | Inducible nitric oxide synthetase                   | Polyclonal   | Insight Biotechnology, Wembley, UK       |
| HLA-DR              | Activated microglia/ macrophages                    | LN3          | Abcam, Cambridge, UK                     |
| IBA-1               | Microglia/ macrophages                              | Polyclonal   | Wako Pure Chemicals ind, Osaka, Japan,   |
| CD68                | Activated microglia/ macrophages                    | KP1          | Dako UK, Ely, UK                         |
| TLR-4               | Toll-like-receptor-4                                | hta125       | Insight Biotechnology                    |
| CD3                 | T lymphocytes                                       | F7. 2. 38    | Abcam, Cambridge, UK                     |
| GFAP                | Astrocytes                                          | Polyclonal   | Dako UK, Ely, UK                         |
| Nfasc155            | Oligodendrocyte neurofascin                         | Polyclonal   | P. Brophy, University of Edinburgh, UK   |
| Caspr1              | Neuronal Caspr1                                     | K65/35       | UC Davis/ NINDS/ NIMH NeuroMab Facility  |
| Na <sub>v</sub> 1   | Voltage gated Na <sup>+</sup> channels $\alpha$ 1   | K58/35       | Sigma Aldrich Ltd.                       |
| Na <sub>v</sub> 1.6 | Voltage gated Na <sup>+</sup> channels $\alpha$ 1.6 | K87A/10      | UC Davis/ NINDS/ NIMH NeuroMab Facility  |

|                     |                                                   |            |                                                    |
|---------------------|---------------------------------------------------|------------|----------------------------------------------------|
| Na <sub>v</sub> 1.6 | Voltage gated Na <sup>+</sup> channels<br>α1.6    | PN4        | Sigma Aldrich Ltd.                                 |
| K <sub>v</sub> 1.2  | Voltage gated K <sup>+</sup> type 1.2<br>channels | K14/16     | UC Davis/ NINDS/ NIMH<br>NeuroMab Facility         |
| βIV spectrin        | βIV spectrin                                      | Polyclonal | M. Komada, Tokyo Institute<br>of Technology, Japan |

---

**Supplementary Table 2:** Cause of death had no impact on measured microglial inflammation, axonal pathology or paranodal disruption.

|                         | Density of MHC-II+<br>microglia (mm <sup>2</sup> ) | Density of Smi32+<br>axons (mm <sup>2</sup> ) | Nfasc155+ paranode<br>length (μm) |
|-------------------------|----------------------------------------------------|-----------------------------------------------|-----------------------------------|
| <b>Ctrl (sudden)</b>    | 97.5 (74.8-136)                                    | 10.2 (3.5-15.8)                               | 2.3 (1.8-2.7)                     |
| <b>Ctrl (infection)</b> | 98.6 (81.6-115.6)                                  | 9.2 (8.8-9.6)                                 | 2.1 (2-2.2)                       |
| <b>P value</b>          | 1.0                                                | 0.8                                           | 0.58                              |
| <b>MS (sudden)</b>      | 173.3 (115-240)                                    | 31.1 (3.5-64.9)                               | 3.1 (2.3-3.6)                     |
| <b>MS (Infection)</b>   | 271.8 (136-612)                                    | 33.5 (24.1-46.9)                              | 3.0 (2.2-4.2)                     |
| <b>P value</b>          | 0.1                                                | 0.53                                          | 0.41                              |

Data range shown in ( )

p value determined by Mann-Whitney test

### **Supplementary Table 2.**

Control and MS cases that died suddenly (myocardial infarct) or with accompanying infection (such as sepsis, respiratory illness) were analysed to determine whether cause of death affected quantifiable measures of microgliosis, axonal pathology or paranode length shown in this report. Cause of death is recorded in Table 1. Two blocks from a single control case that died with an infection, and 4 blocks from 3 MS cases that died suddenly were not significantly different when compared to the respective control and MS values.

Comparing Nfasc155<sup>+</sup> structure length between the MS cohort with the shortest post-mortem delay (PMD; less than 15hrs, n=8) and the remaining MS cases (n=10, PMD 15-24hrs) revealed there to be no effect of PMD on Nfasc155 measures (2.90± 0.1 and 2.91± 0.1μm, respectively).

Supplementary Figure 1

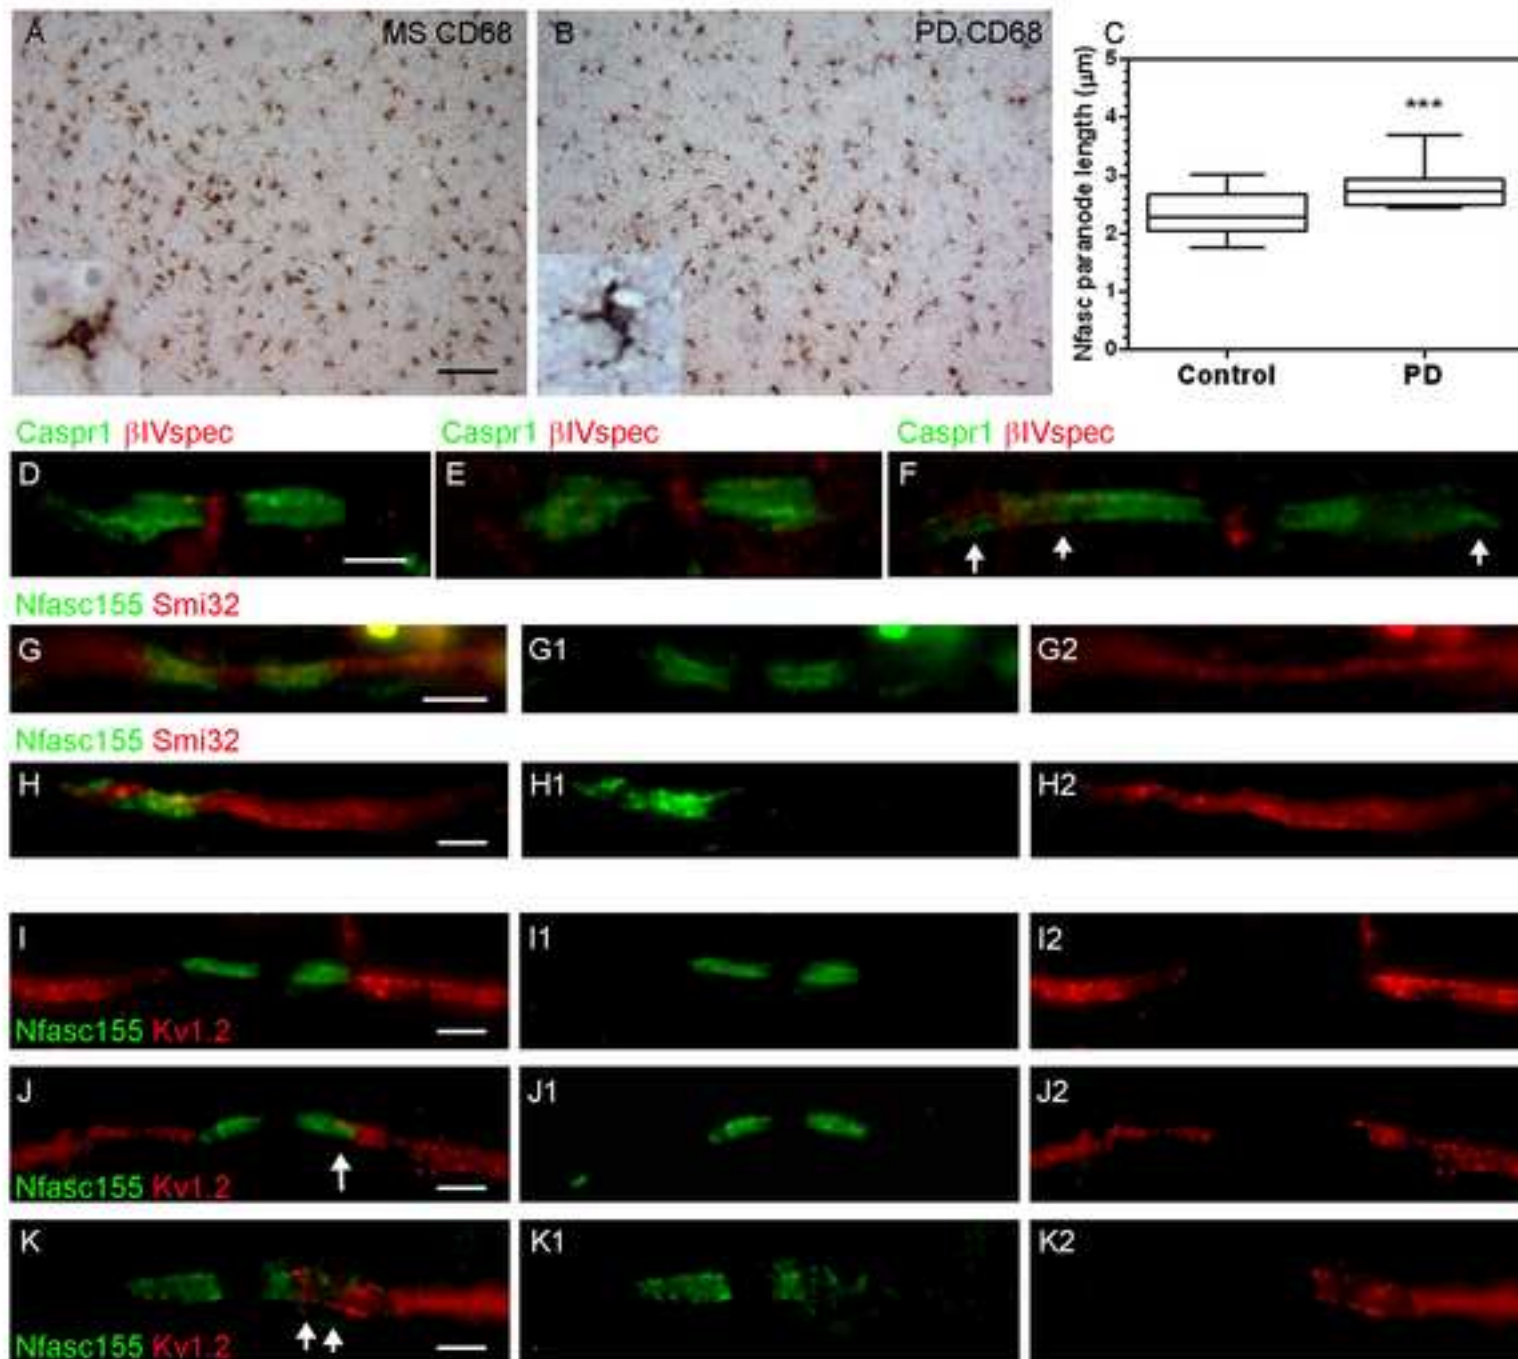

Supplement: NIHMS61896-supplement-01.pdf [file NIHMS61896-supplement-01.pdf]
